# Supplementary material for: Cca-miR398 increases copper sulfate stress sensitivity via the regulation of CSD mRNA transcription levels in transgenic Arabidopsis thaliana
Source: PeerJ. 2020 May 26;8:e9105. doi: 10.7717/peerj.9105 (PMC7258901; doi:10.7717/peerj.9105)
Supplement: Table S1 — Including cca-miR398, Unigene048628, Unigene032278, Unigene032279, Unigene023925, AT1G08830.1, AT2G28190.1, AT5G18100.1, miR397, miR408, [file peerj-08-9105-s001.xls]

## Sheet: Sheet1
	Table S1: Sequences used in this paper
	Gene ID	Descritption	Remarks	Sequence
	Unigene048628	CSD1	Candidate gene	ATGGTGAAGGCTGTGGCTGTTCTTGGAAACAGTGAGGGTGTCAAGGGTACTATTCACTTCACGCAAGAAGCTGATGGCTCTACTAAAGTAACTGGAAATGTTTCTGGCCTTAGGCCTGGTCCCCATGGCTTCCATGTTCATGCACTTGGGGACACGACAAATGGTTGCATGTCAACTGGACCACATTTCAACCCTGCTGGCAAAGAGCATGGTGCTCCAGTGGATGAGAACCGTCATGCTGGTGATCTGGGAAATATCACTGCTGGTGTGGATGGCGCAGCCAAAATCGAAATAACTGACAAGCAGATTCCGCTTTCTGGACCAAATTCCATTATTGGAAGGGCCATTGTTGTCCATGCAGATCCAGATGATCTTGGCAAGGGGGGACATGAACTTAGC…
	Unigene032278	CSD2	Candidate gene	ATGCAAGCTGCACTGGCATCCATGGCTGCCCACTCACTCATTCTCTCTGCTCCTCAATTCTGCCCAAATCCTCACAACCCACCTCCTCCTCGCCTCCGCTCGTTCTACTTCCTCCACGGTGCCTCCCTCAAGCTCTCTCGCCAATCTCCGACCCTCTCACTTTCCGCCAAACCACTCACTGTCTTCGCCGCCACTAGGAAAGCCGTAGCCGTCCTCAAGGGCAACTCAAATGTCGAAGGCGTTGTTACGTTGACCCAGGAAGACGATGGTCCCACAACTGTCAATGTACGTATTACTGGGCTTACTCCAGGGCCTCATGGGTTTCACCTACATGAGTATGGTGATACAACAAATGGATGCATGTCAACAGGAGCACATTTCAACCCTAACAATCTGACA…
	Unigene032279	CSD2	Candidate gene	ATGCAAGCTGCACTGTCAGCCATGGCCGCCCAAATCATCATCCTCTCTCCTCCTCACTTCTCCCCAAACCTTCACCACCCAACTCCTCTCCTCGGCTCCTCCTTCCTCCACGGCGCCTCCCTCAAGCTCCCCACCCAATCTATGACCCTCTCACTTTCCGCCAAACCACTCACTGTCGTCGCCGCCACCAAGAGAGCCGTAGCCGTCCTCAAGGGAAACTCAAAAGTCGAAGGCGTTGTTACGTTGGCCCAAAAAGACGACGGTCCAACAACAATCAATGTTCGTGTTACTGGGCTTACTGCGGGGCCTCATGGATTTCACCTACATGAGTATGGTGACACGACAAATGGGTGCATCTCAACCGGAGCACATTTCAACCCTAAGAACCTGACACATGGT…
	Unigene023925	CSD3	Candidate gene	ATGAGTACTGTGAAAGCTGTGGCTCTCATCTCCGGGGACAACAACATTAGAAGCTCTCTCAATTTCGTCCAGGACCCCTACGGCTCAACCCATGTGAAGGGGAGGATTACCGGACTCTCACCTGGCCTTCACGGCTTCCATATTCACGCTCTTGGCGATACAACCAATGGCTGCAACTCCACTGGTCCTCATTTCAACCCACTGAAGAAGTATCATGGATCTCCTATAGATAAAGAGCGTCACGCTGGTGATTTGGGTAACATTGTTGCAGGCCCAGATGGAGTAGCTGAAATTTCCATCAAGGATGATCAGATTCTGCTCAGTGGTCCTCATTCCATACTTGGGAGGGCGGTTGTTGTGCATGCTGATCCTGATGATCTTGGTAGAGGTGGACATGAA…
	AT1G08830	CSD1	Candidate gene	ATGGCGAAAGGAGTTGCAGTTTTGAACAGCAGTGAGGGTGTTACGGGGACTATCTTTTTCACCCAGGAAGGCGATGGTGTGACCACTGTGAGTGGAACAGTTTCTGGCCTTAAGCCTGGTCTTCATGGTTTCCATGTCCATGCTCTTGGTGACACCACTAACGGTTGCATGTCTACTGGTCCACATTTCAACCCCGATGGTAAAACACACGGTGCCCCTGAGGATGCTAATCGACATGCTGGTGATCTAGGAAACATCACTGTTGGAGATGATGGAACTGCCACCTTCACAATCACTGATTGCCAGATTCCTCTTACTGGACCAAACTCTATTGTTGGTAGGGCTGTTGTTGTCCATGCAGACCCTGATGACCTCGGAAAGGGAGGCCATGAACTCAGC…
	AT2G28190	CSD2	Candidate gene	ATGGCTGCCACCAACACAATCCTCGCATTCTCATCTCCTTCTCGTCTTCTCATTCCTCCTTCCTCCAATCCTTCAACTCTCCGTTCCTCTTTCCGCGGCGTCTCTCTCAACAACAACAATCTCCACCGTCTCCAATCTGTTTCCTTCGCCGTTAAAGCTCCGTCGAAAGCGTTGACAGTTGTTTCCGCGGCGAAGAAGGCTGTTGCAGTGCTTAAAGGTACTTCTGATGTCGAAGGAGTTGTTACTTTGACCCAAGATGACTCAGGTCCTACAACTGTGAATGTTCGTATCACTGGTCTCACTCCAGGGCCTCATGGATTTCATCTCCATGAGTTTGGTGATACAACTAATGGATGTATCTCAACAGGACCACATTTCAACCCTAACAACATGACACAC…
	AT5G18100	CDS3	Candidate gene	ATGGAAGCTCCTAGAGGAAATCTGAGAGCGGTGGCTCTTATCGCCGGCGATAACAACGTCCGAGGCTGTCTTCAATTCGTACAAGACATTTCCGGAACTACTCATGTCACCGGGAAGATCTCAGGACTCTCTCCTGGCTTCCATGGATTTCATATTCACTCTTTTGGTGATACCACAAATGGCTGCATCTCTACTGGACCTCACTTCAATCCATTAAATCGAGTTCACGGGCCACCGAACGAGGAAGAGCGTCATGCTGGCGATTTGGGTAACATTCTTGCAGGATCAAACGGTGTTGCTGAAATCTTAATCAAAGACAAACATATACCGCTTAGTGGGCAGTATTCCATACTCGGGAGGGCGGTTGTTGTGCATGCGGATCCTGATGACCTTGGGAAA…
	miR397		Candidate miRNA	TCATTGAGTGCAGCGTTGATG
	miR408		Candidate miRNA	ACAGGGAACAAGCAGAGCATG
	cca-miR398		Candidate miRNA	TGTGTTCTCAGGTCGCCCCTG
	Actin		Constitutive gene	CACCCAGTCCTCCTTACAGAGGCTCCTCTTAACCCTAAGGCTAACAGAGAGAAGATGACTCAAATCATGTTTGAGACCTTCAATGTGCCTGCAATGTATGTTGCTATCCAGGCTGTCCTTTCCCTGTATGCCAGTGGTCGTACAACTGGTATTGTGCTGGATTCTGGTGATGGTGTGTCTCACACTGTGCCCATCTATGAAGGGTATGCCCTTCCACATGCCATCCTTCGTTTGGATCTTGCTGGTCGTGATCTCACTGATGCTTTGATGAAGATCCTCACCGAGAGAGGTTACATGTTCACCACCACTGCTGAACGGGAAATTGTCCGTGACATGAAGGAGAAACTTGCATATGTTGCCCTTGACTATGAGCAGGAGCTTGAGACTGCCAAGAGTAGC…
	5.8S ribosomal RNA	5.8S rRNA	Constitutive miRNA	TTTCCGTAGGTGAACCTGCGGAAGGATCATTGTCAAAACCTGCATAGCAGAACGACCCGCGAATAAGTAA GACAACTCTCGGGTGACCTCTGGAGCCCTTCGGGTGCCATTGAGAACCTAATGGCTAAGTCGTGTAATGC CAAGCTAGGCTTCGGCCTGTGTGACATGCACTGCTCAGTCTATCAACTAACCCCGGCGCAAGACGCGCCA AGGAAAACATGTATTGAAAAAGAAGGCGCGTTTGACCGACCCCGGCTTCGGGATCTCGGAAAGAATGTTG TCATCTTTTCTTAGAAAAAACGACTCTCGGCAACGGATATCTCGGCTCTCGCATCGATGAAGAACGCAGC GAAATGCGATACTTGGTGTGAATTGCAGAATCCCGCGAACCATC…
