# Supplementary material for: Cca-miR398 increases copper sulfate stress sensitivity via the regulation of CSD mRNA transcription levels in transgenic Arabidopsis thaliana
Source: PeerJ. 2020 May 26;8:e9105. doi: 10.7717/peerj.9105 (PMC7258901; doi:10.7717/peerj.9105)
Supplement: Table S2 — Red font indicates precursor sequence, the blue font indicates mature miR398 sequence. [file peerj-08-9105-s002.xls]

## Sheet: Sheet1
Table S2: miR398 sequence information. As follows: Red font indicates precursor sequence, the blue font indicates mature miR398 sequence.
ACGGAAGTACTGAGGTGTAGTACATTTTTTTAGGTAAAGTACTGATTTAAAAGTGTTGCTGTGGCTATATAACATGGAATATCTTTCTCCATTGGCATCACCAGATTGTGGGGAAAGAGGCAAGAAAGTCGTGTAAATTAAAGGTGGATGAGCCTTACAGGGGCAACATGAGATCACATGTGGGCATTCTTATTATTCACATGACACCCTTTCTGCTTGTGTTCATGTGTCCTATAGACTACAAATGTGTTCTCAGGTCGCCCCTGCAGGACTTTCCTCCACCGCATGATCATGATCATGGTGATGCAATCGGCTTGATGGTTTTAAGCTGGCAATAATCATAGCTTAATAGCCAGGTCAGCAAGGTCATCTTCCCCAACTCCTTTCCAAATCCCACCG…
